# Supplementary material
Source: PubMed Central journal article supplement (PMC7920176)
Supplement: ASN.2020081126SupplementaryData.pdf [file ASN.2020081126SupplementaryData.pdf]

# SRGAP1 controls small Rho GTPases to regulate podocyte foot process maintenance

Manuel Rogg<sup>1,2</sup>, Jasmin I. Maier<sup>1</sup>, Robert Dotzauer<sup>2</sup>, Nadine Artelt<sup>3</sup>, Oliver Kretz<sup>4</sup>, Martin Helmstädter<sup>2</sup>, Ahmed Abed<sup>2</sup>, Alena Sammarco<sup>1</sup>, August Sigle<sup>2,5</sup>, Dominik Sellung<sup>2,6</sup>, Patrick Dinse<sup>2</sup>, Karoline Reiche<sup>2</sup>, Mako Yasuda-Yamahara<sup>2,7</sup>, Martin L. Biniossek<sup>8</sup>, Gerd Walz<sup>2</sup>, Martin Werner<sup>1</sup>, Nicole Endlich<sup>3</sup>, Oliver Schilling<sup>1</sup>, Tobias B. Huber<sup>4#</sup> and Christoph Schell<sup>1,9#\*</sup>

<sup>1</sup> Institute of Surgical Pathology, Faculty of Medicine, Medical Centre - University of Freiburg, Freiburg, Germany

<sup>2</sup> Department of Medicine IV, Faculty of Medicine, Medical Centre - University of Freiburg, Freiburg, Germany

<sup>3</sup> Department of Anatomy and Cell Biology, University Medicine Greifswald, Greifswald, Germany.

<sup>4</sup> III. Department of Medicine, University Medical Center Hamburg-Eppendorf, Hamburg, Germany

<sup>5</sup> Department of Urology, Medical Center - University of Freiburg, Faculty of Medicine, University of Freiburg, Freiburg, Germany.

<sup>6</sup> Department of Neurology, Heimer Institute for Muscle Research, University Hospital Bergmannsheil, Ruhr-University Bochum, Bochum, Germany

<sup>7</sup> Department of Medicine, Shiga University of Medical Science, Otsu, Shiga 520-2192, Japan

<sup>8</sup> Institute of Molecular Medicine and Cell Research, Faculty of Medicine, Medical Centre - University of Freiburg, Freiburg, Germany

<sup>9</sup> Berta-Ottenstein Program, Medical Faculty, University Medical Center Freiburg, Germany

# contributed equally

\* To whom correspondence should be addressed:

Dr. Dr. Christoph Schell  
Institute of Surgical Pathology  
University Medical Center Freiburg  
Breisacherstr. 115a, D-79106 Freiburg, Germany  
[christoph.schell@uniklinik-freiburg.de](mailto:christoph.schell@uniklinik-freiburg.de)

Prof. Dr. Tobias Huber  
III. Department of Medicine  
University Medical Center Hamburg-Eppendorf  
Martinistraße 52, D-20246 Hamburg, Germany  
[t.huber@uke.de](mailto:t.huber@uke.de)

## **Supplemental Material**

Supplemental Figure 1. Podocyte Rho GTPase network analysis, corresponding to Figure 1.

Supplemental Figure 2. ISH analysis of *Srgap1/2/3* expression, corresponding to Figure 1.

Supplemental Figure 3. Analysis of SRGAP1 expression, corresponding to Figure 2.

Supplemental Figure 4. Characteristics of experimental mice, corresponding to Figure 2&3.

Supplemental Figure 5. Characteristics of experimental mice, corresponding to Figure 3.

Supplemental Figure 6. Analysis of subcellular SRGAP1 localization, corresponding to Figure 4.

Supplemental Figure 7. Analysis of *SRGAP1* KO podocytes, corresponding to Figure 5

Supplemental Figure 8. Analysis of *SRGAP1* KO podocytes, corresponding to Figure 5

Supplemental Figure 9. SRGAP1 interactome, corresponding to Figure 5.

Supplemental Figure 10. PEMP of *Srgap1* mice, corresponding to Figure 6.

Supplementary Table 1. Antibodies.

Supplementary Table 2. In situ hybridization primer.

Supplementary Table 3. Rho GTPase expression in murine podocytes.

Supplementary Table 4. RhoGEF & RhoGAP expression in murine podocytes.

## Supplemental Figure 1

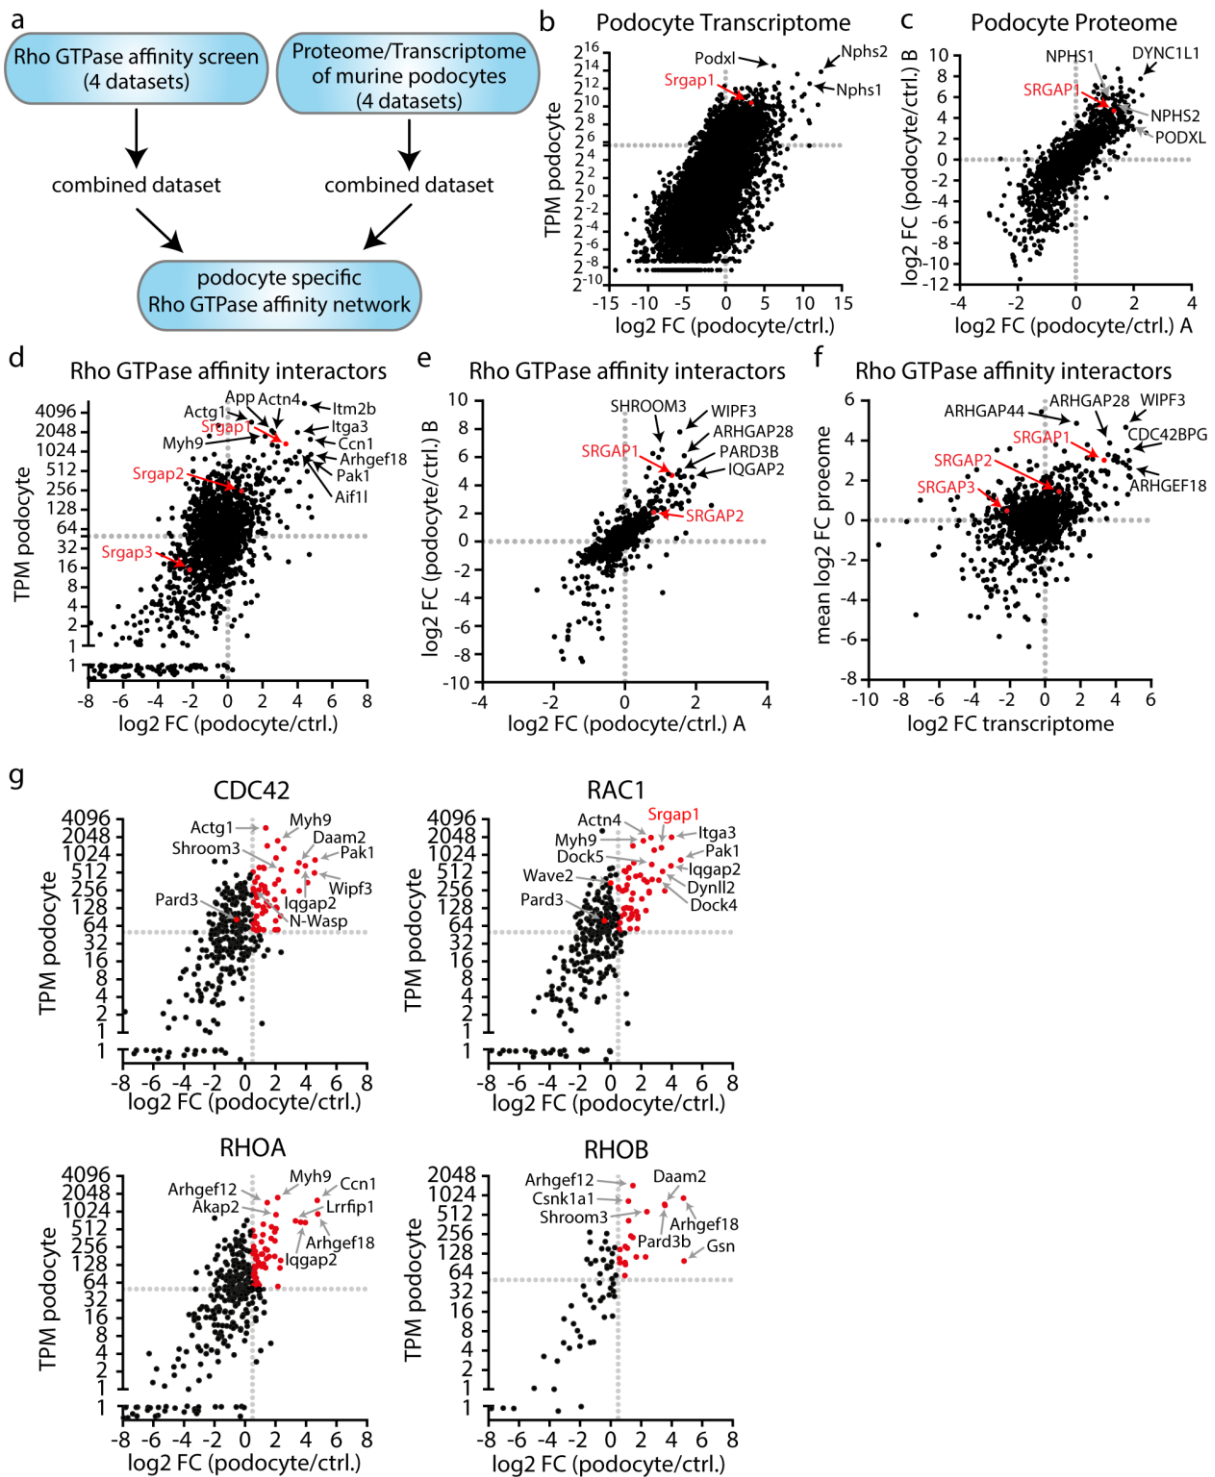

Supplemental Figure 1

(a) Schematic depicting the generation of a podocyte specific Rho GTPase affinity interaction network.

(b) Volcano plot of transcriptome analysis of isolated murine podocytes analyzed and assembled from open available and published datasets<sup>1, 2</sup> showed highly selective enrichment in podocytes for *Podxl*, *Nphs1*, *Nphs2* and *Srgap1*.

(c) Volcano plot of proteome analysis of isolated murine podocytes analyzed and assembled from published datasets<sup>3, 4</sup> showed highly podocyte specific enrichment for PODXL, NPHS1, NPHS2, DYNC1L1 and SRGAP1.

(d) Volcano plot of podocyte transcriptome data filtered for mapped Rho GTPase affinity interactions demonstrated highly specific enrichment of *Srgap1* and other known hereditary nephrosis genes like *Actn4* and *Itga3* as well as novel podocyte specific Rho GTPase interacting genes.

(e) Volcano plot of podocyte proteome filtered for mapped Rho GTPase affinity interactors showed highly specific enrichment of SRGAP1 and known as well as novel podocyte specific Rho GTPase interacting proteins.

(f) Volcano plot comparing podocyte transcriptome and proteome data filtered for mapped Rho GTPase affinity interactors showing podocyte enrichment of SRGAP1.

(g) Rho GTPase affinity interactome mapping confirmed RAC1, CDC42, RHOA and RHOB as central nodes for cytoskeletal signaling in podocytes. Volcano plots show transcriptome analysis of isolated murine podocytes filtered for proximity interactors of *Rac1*, *Cdc42*, *Rhoa* and *Rhob* (TPM – transcripts per million; FC – fold change).

**Supplemental Figure 2**

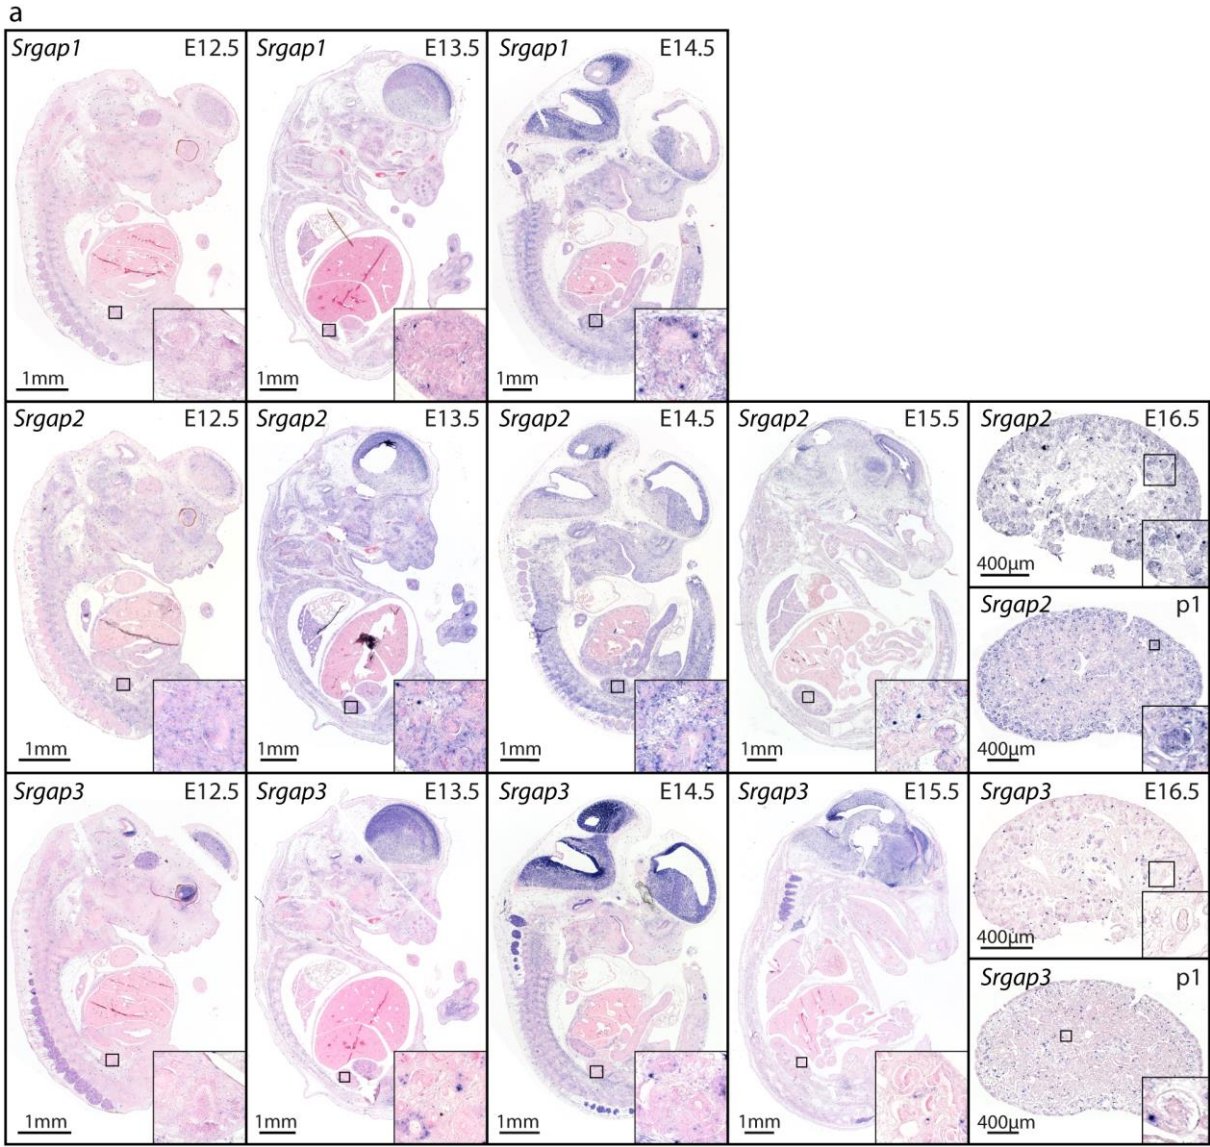

Supplemental Figure 2

(a) mRNA in situ hybridization confirmed expression of *Srgap2* and no detectable expression of *Srgap3* in murine podocytes (boxes indicate magnified areas; overviews are stitched from multiple pictures). mRNA in situ hybridization of *Srgap1* at E12.5 to 14.5 (corresponding to main Figure 1),

Supplemental Figure 3

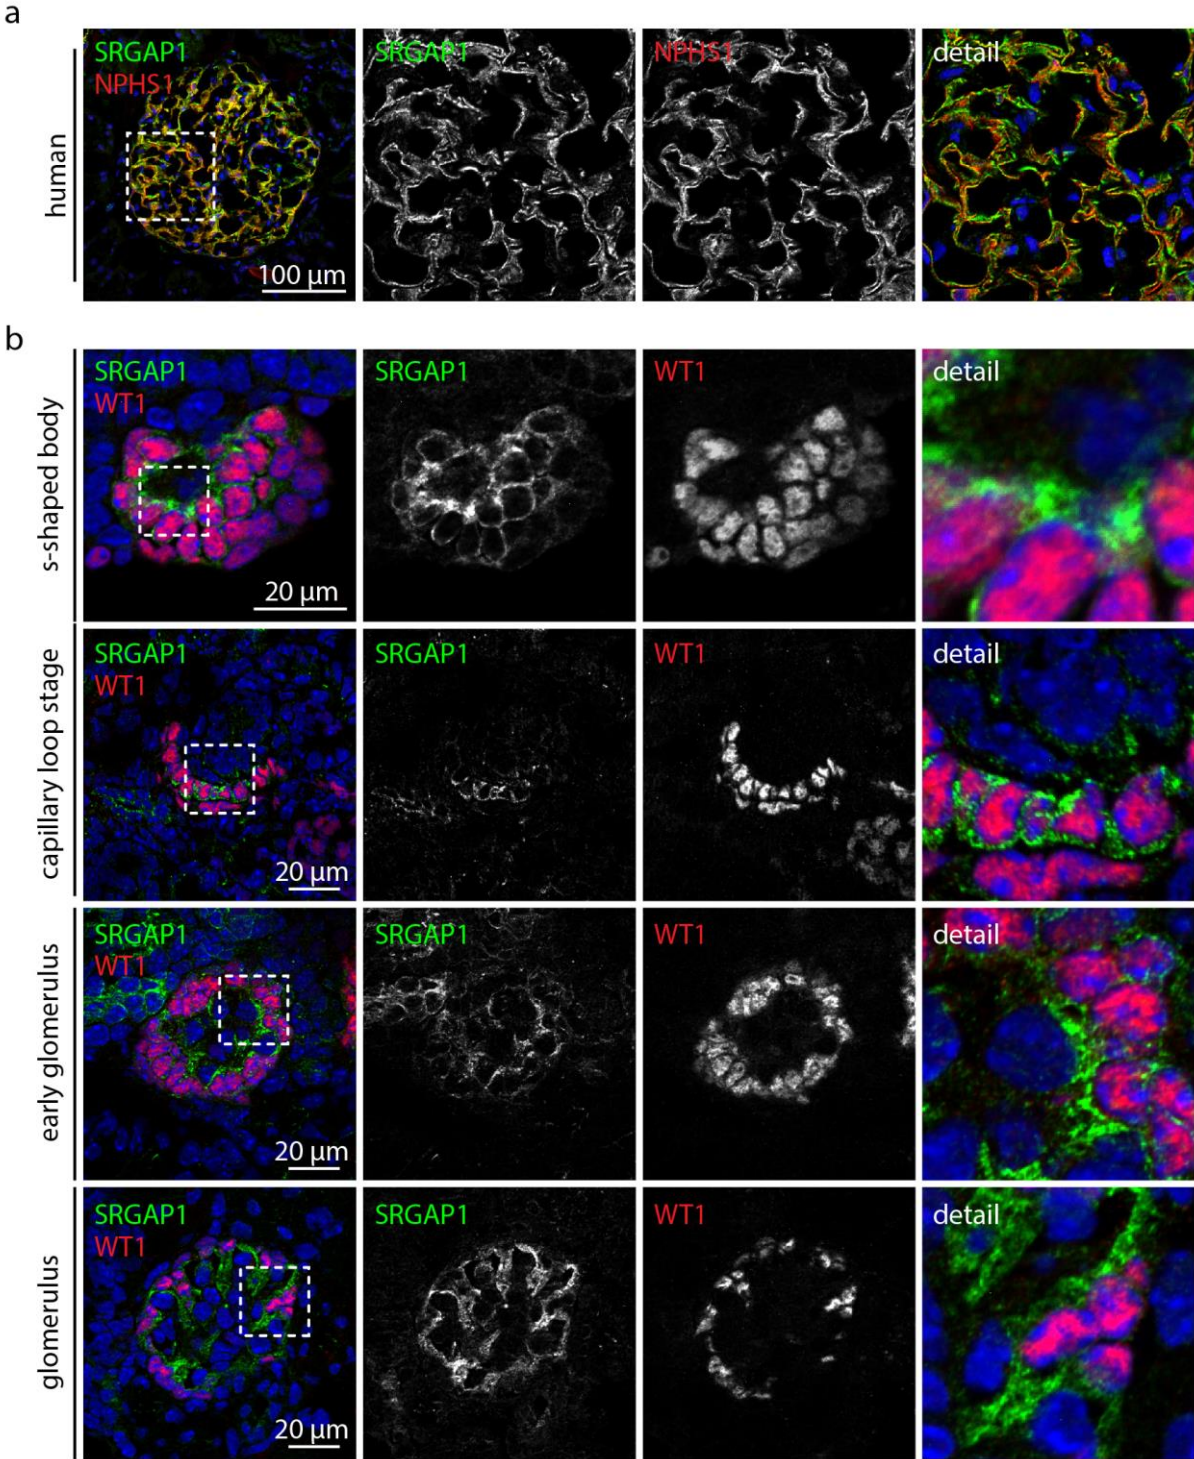

Supplemental Figure 3

(a) Immunofluorescence staining of human kidney section for SRGAP1 and the podocyte marker NPHS1 demonstrated specific localization of SRGAP1 in human podocytes *in vivo* (box indicates magnified area).

(b) Immunofluorescence staining of developing murine nephrons for SRGAP1 and the podocyte marker WT1 demonstrated specific localization of SRGAP1 in podocytes (boxes indicate magnified areas).

Supplemental Figure 4

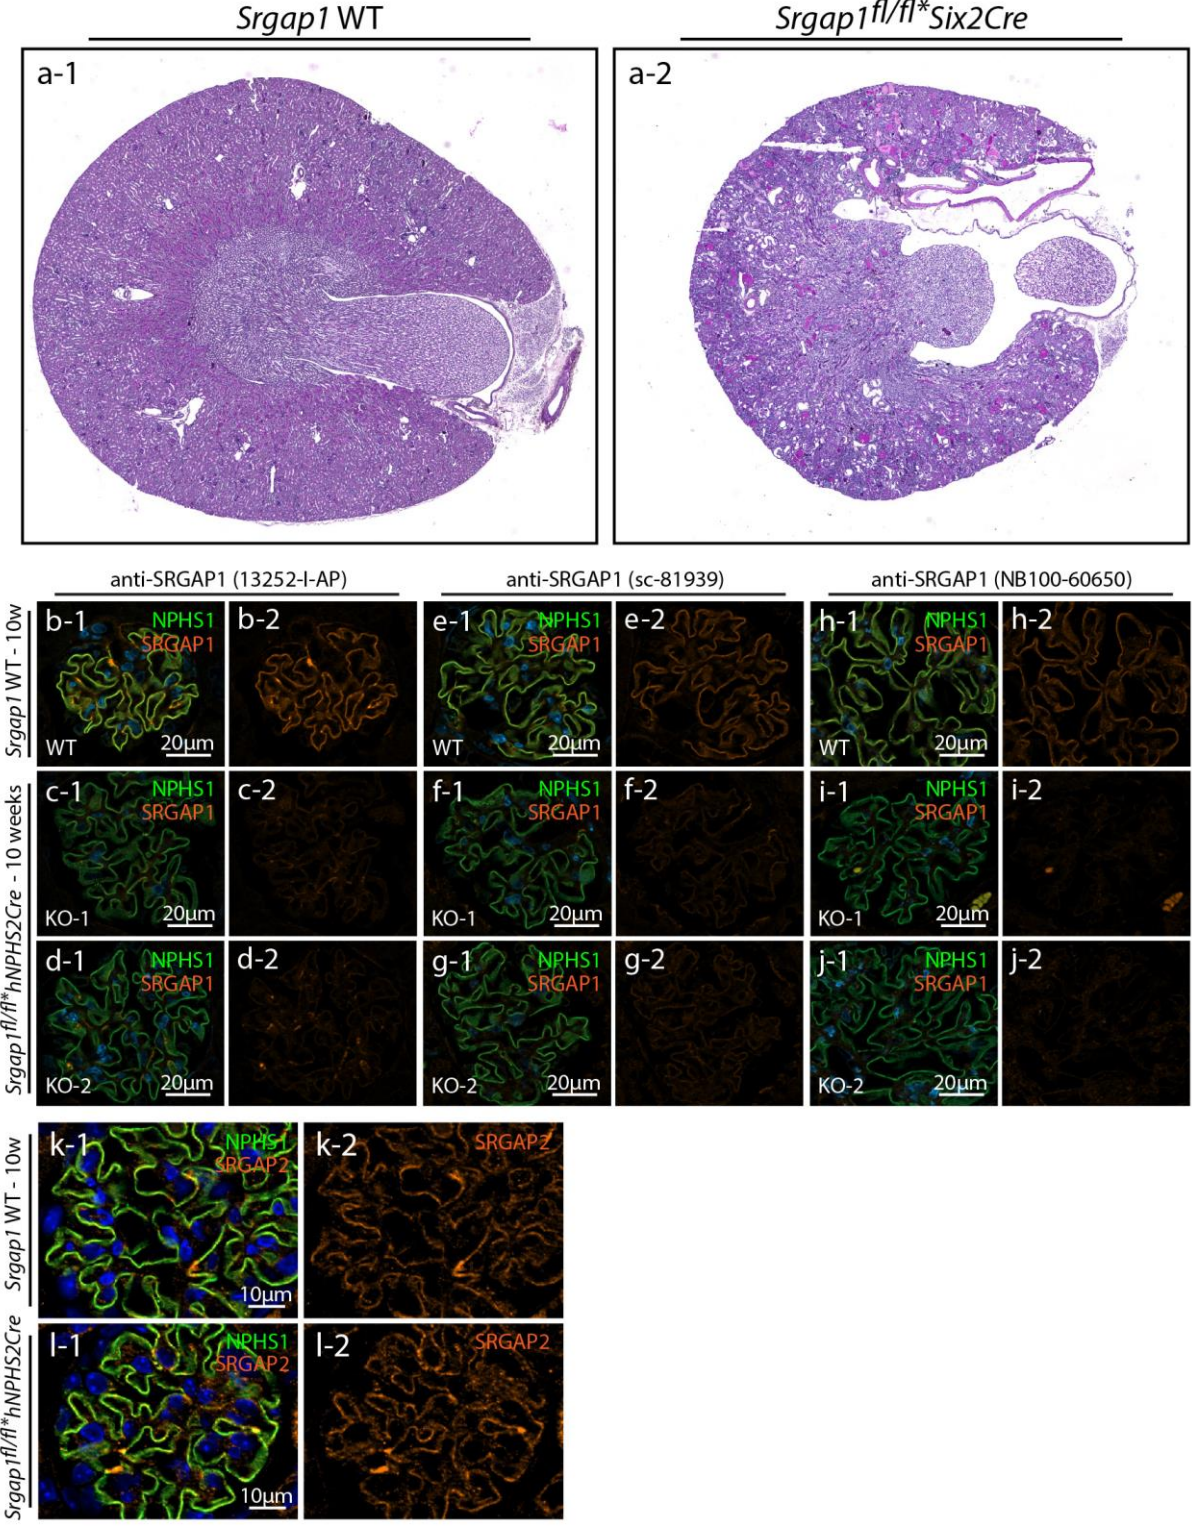

Supplemental Figure 4

(a) Overview histology of wild type and *Srgap1<sup>fl/fl</sup>\*Six2Cre* kidney sections demonstrated proteinaceous casts, dilated tubules, focal obliteration and sclerosis of glomeruli in kidneys of



KO mice (overview images for PAS staining presented in Figure 2f; overviews were stitched from multiple pictures).

(b-j) Immunofluorescence of murine kidney sections of *Srgap1* WT and *Srgap1<sup>fl/fl</sup>\*hNPHS2Cre* KO mice for SRGAP1 and NPHS1 demonstrated loss of SRGAP1 signal in podocytes of KO mice by 3 independent antibodies (for details about individual antibodies see material and methods section).

(k-l) Levels of SRGAP2 signal was not obviously altered in *Srgap1<sup>fl/fl</sup>\*hNPHS2Cre* mice as demonstrated by immunofluorescence for SRGAP2 and NPHS1.

Supplemental Figure 5

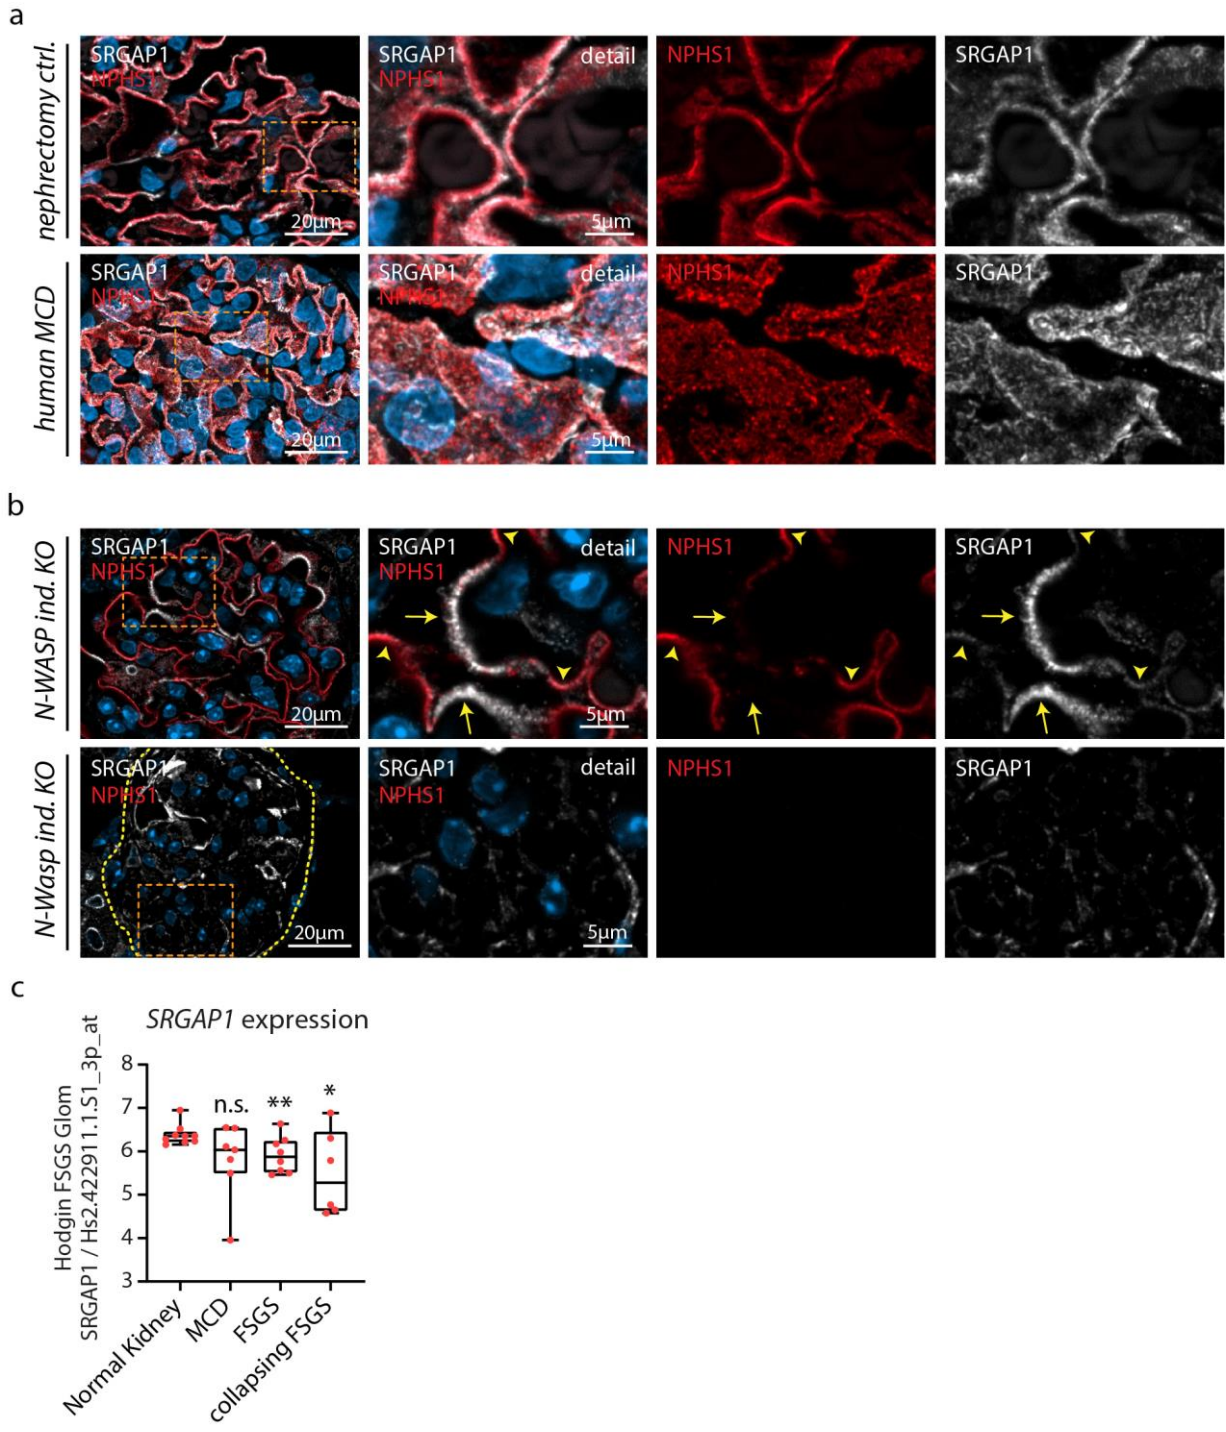

Supplemental Figure 5

(a) Immunofluorescence analysis of human nephrectomy and minimal change disease (MCD) specimens showed only slight alterations of SRGAP1 signal (SDs were co-stained by NPHS1; boxes indicate magnified areas).

(b) Immunofluorescence analysis of a genetic FSGS model demonstrated increased recruitment of SRGAP1 to glomerular regions with diminished levels of NPHS1 signal intensities (indicative of SD degradation - yellow arrows; yellow arrowheads mark regions with unaffected NPHS1 and SRGAP1 signals). Strongly diseased glomeruli show pronounced decrease in SRGAP1 signal and loss of NPHS1 signal as evaluated by immunofluorescence staining.

(c) Analysis of *SRGAP1* mRNA expression in human glomerular disease using microarrays of the "Hodgin FSGS Glom" dataset deposited in the *Nephroseq* database (scatter dots indicate individual cases; n.s. non-significant, \* $p < 0.05$ , \*\* $p < 0.01$ ).

**Supplemental Figure 6**

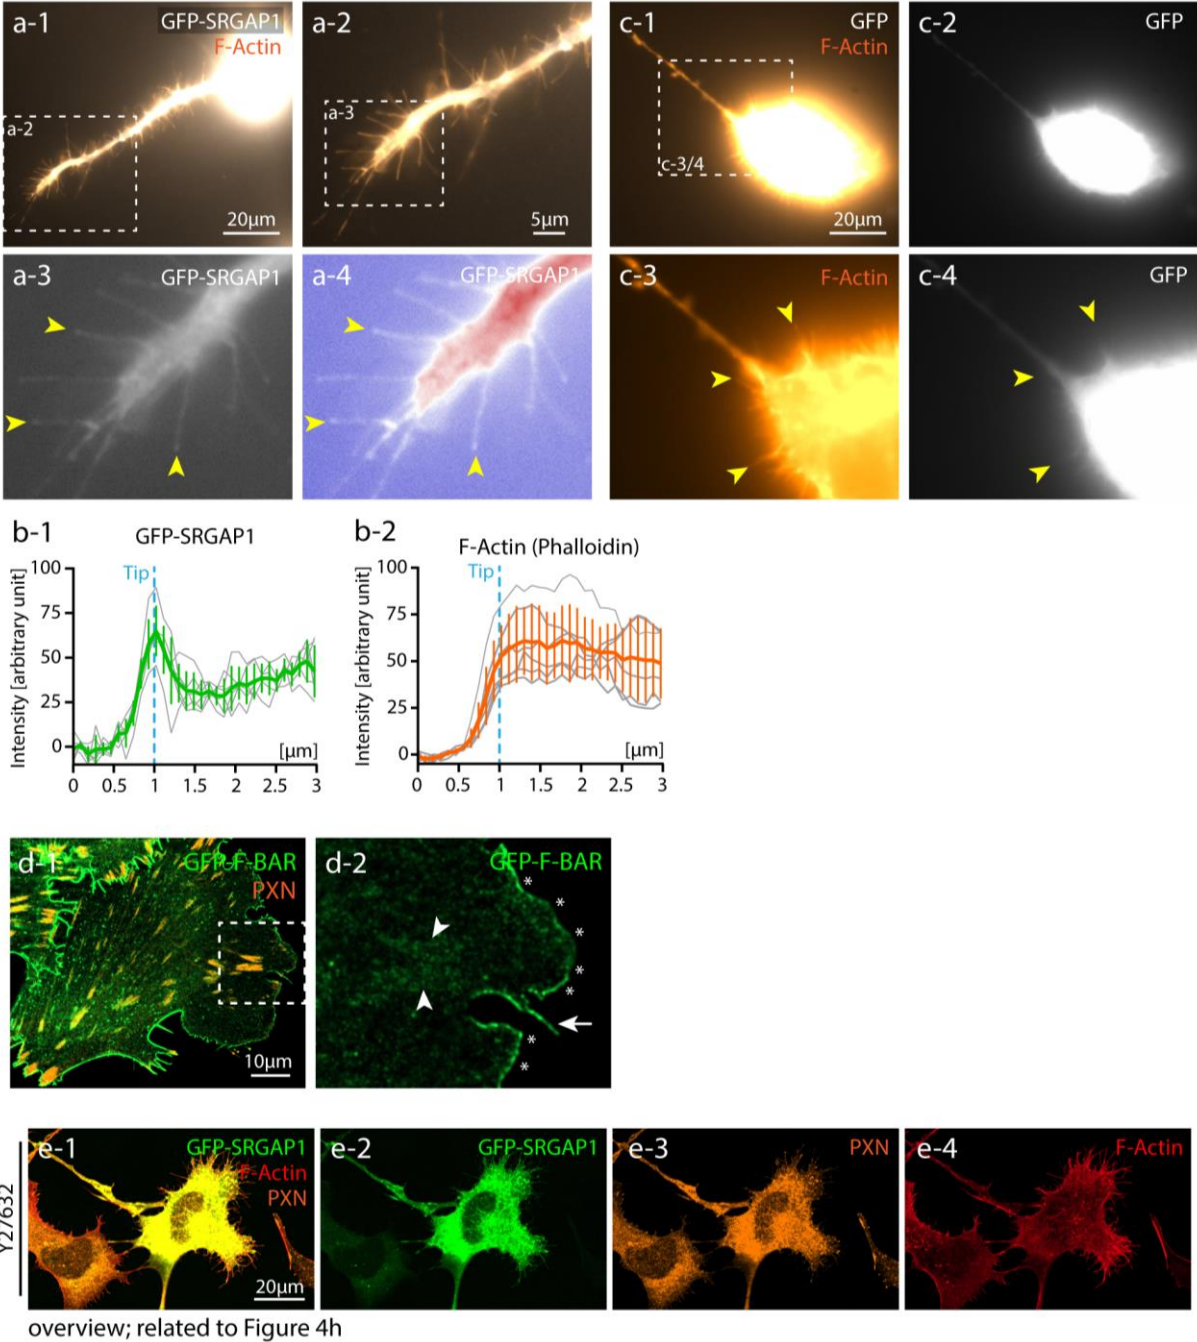

**Supplemental Figure 6**

(a-c) Immunofluorescence analysis demonstrated enhanced cytoplasmic localization of GFP-SRGAP1 to podocyte 3D protrusions *in vitro* (arrowheads indicate filopodial protrusions). GFP was expressed as control.

(d) Recruitment to lamellipodia and filopodia but not to IACs is probably mediated by the F-BAR domain of SRGAP1 as indicated by a SRGAP1 GFP-F-BAR domain reporter.

(e) Subcellular distribution of GFP-SRGAP1, PXN and F-Actin (Phalloidin) in Y27632 treated podocytes (overview related to Figure 4h).

**Supplemental Figure 7**

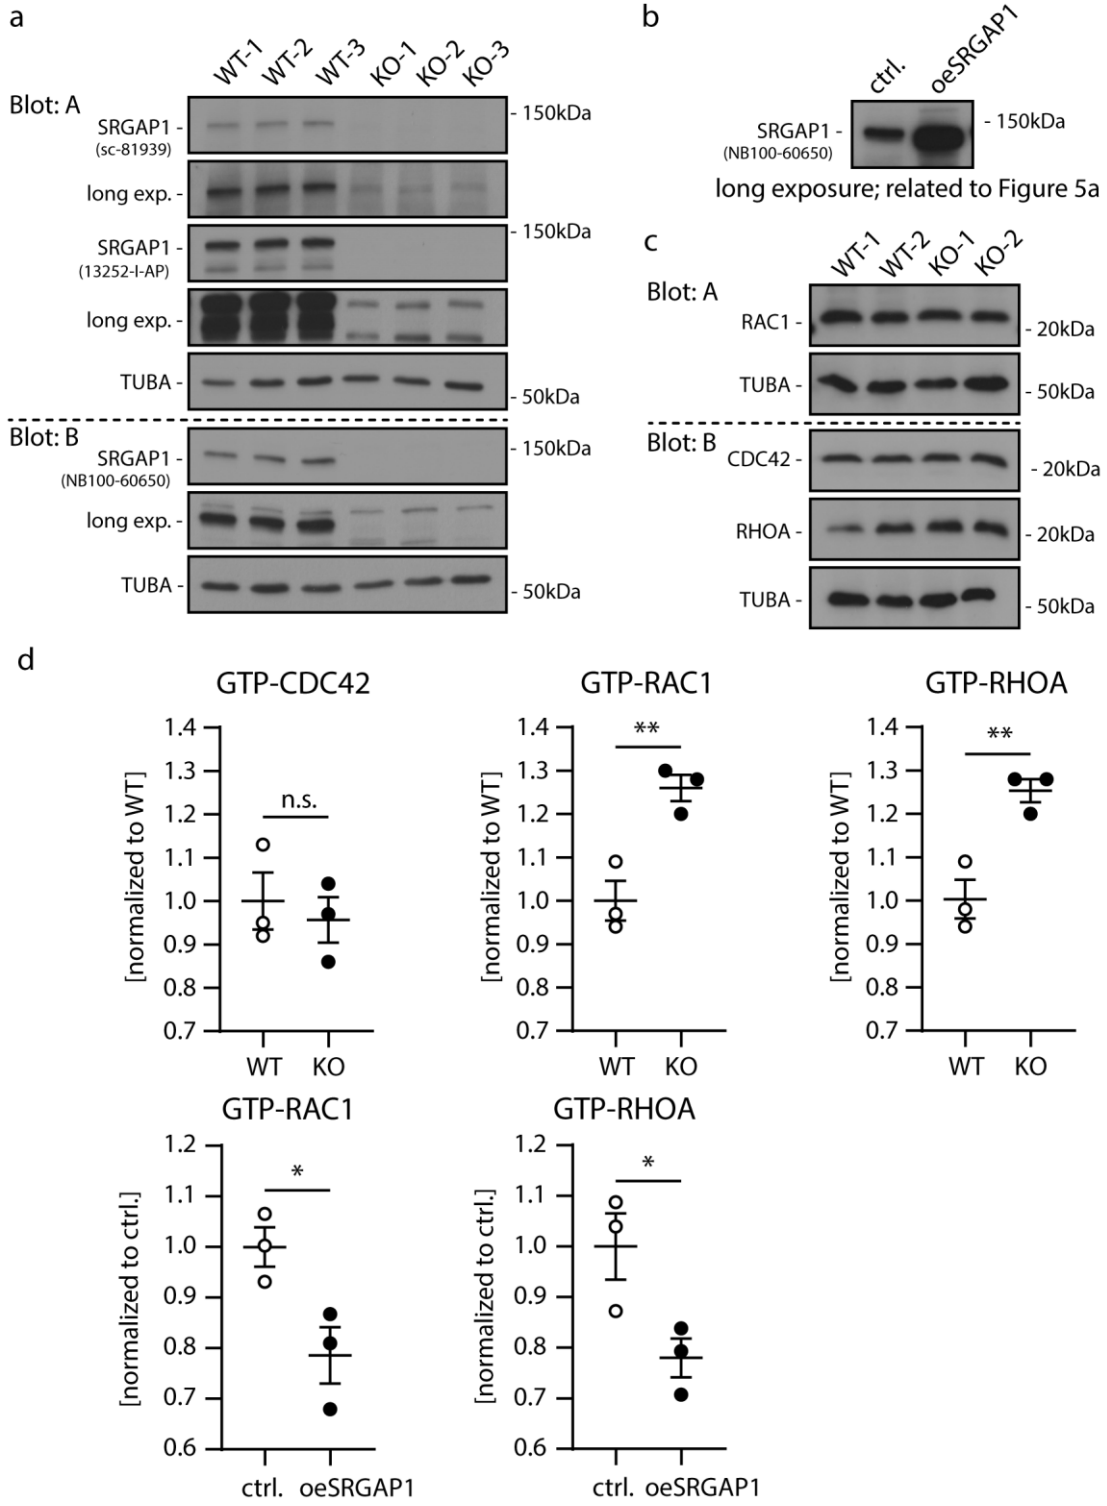

Supplemental Figure 7

(a) Western blot analysis of CRISPR/Cas9 genome edited *SRGAP1* WT and KO podocyte clones. Loss of *SRGAP1* signal was validated by 3 independent antibodies (exp. - exposure).

(b) Western blot analysis of SRGAP1 overexpression and control podocytes Long exposure immunoblot related to SRGAP1 expression analysis shown in Figure 5a.

(c) Western blot analysis of *SRGAP1* WT and KO podocyte for expression of the Rho GTPases RAC1, CDC42 and RHOA.

(d) Quantification of GTP-CDC42, GTP-RAC1 and GTP-RHOA levels in *SRGAP1* WT, *SRGAP1* KO, SRGAP1 overexpression and control podocytes (n=3 replicates; \*p<0.05, \*\*p<0.01).

## Supplemental Figure 8

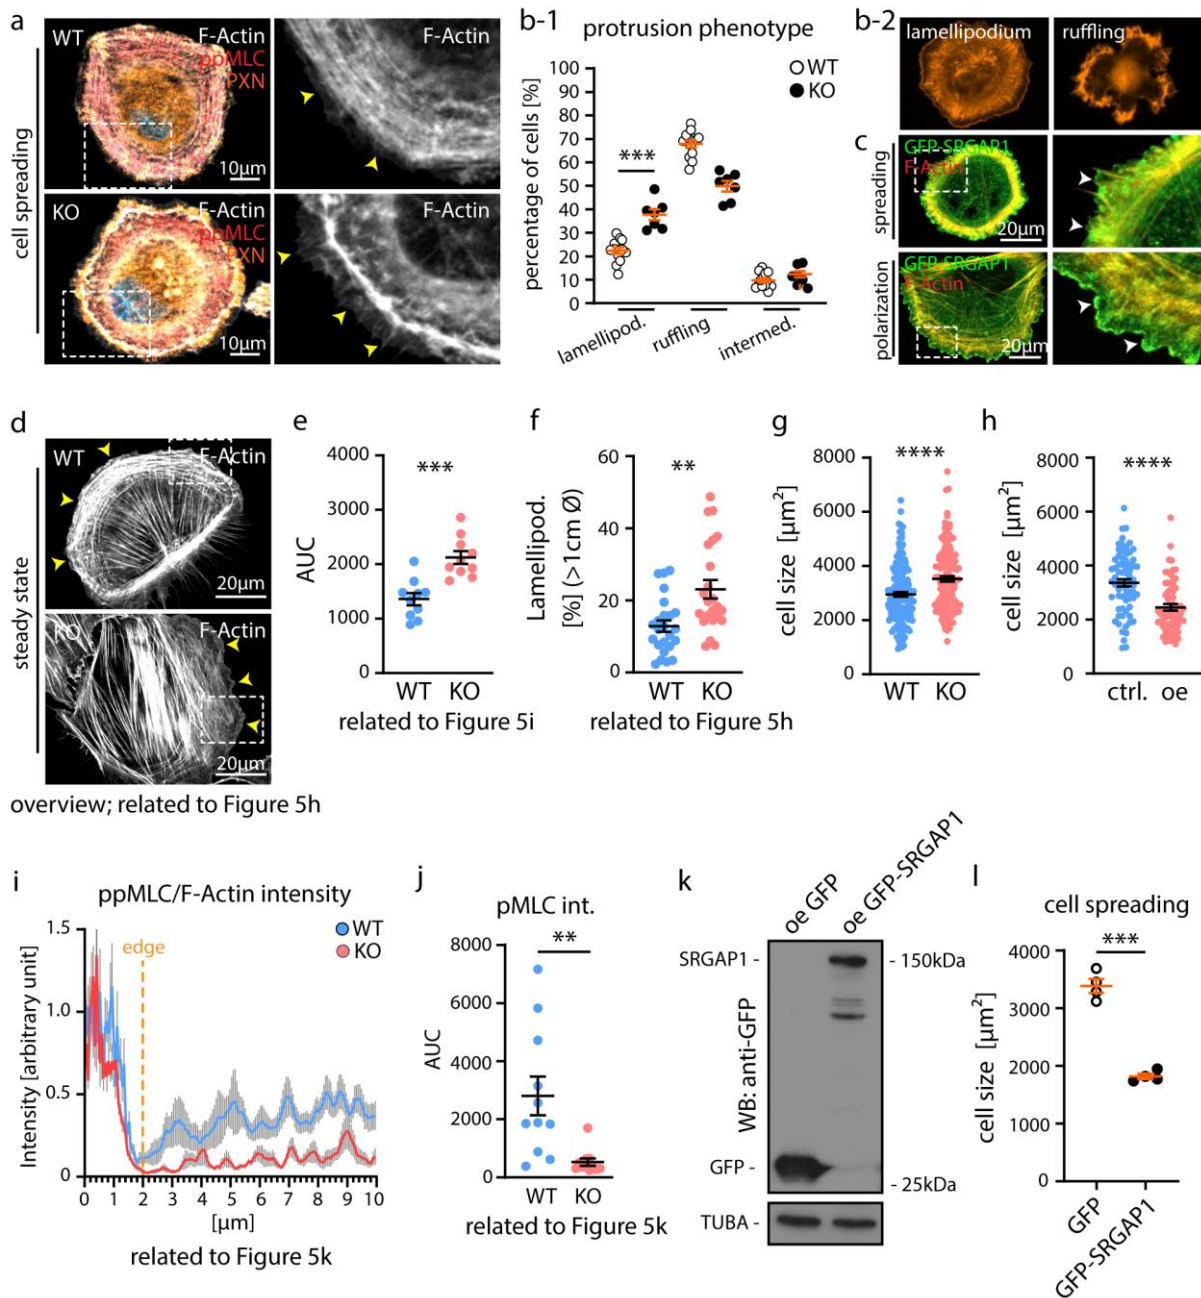

## Supplemental Figure 8

(a) Spreading *SRGAP1* KO podocytes exhibited increased lamellipodia formation (arrowheads). Podocytes were co-stained for F-Actin and PXN (boxes indicate magnified areas).

(b) Quantification of protrusion phenotypes of spreading *SRGAP1* KO and WT podocytes (scatter dots indicate independent experiments; \*\*\*  $p < 0.001$ ; bi-2 shows representative images for lamellipodium and ruffling cells).

(c) GFP-SRGAP1 localized to lamellipodia (arrowhead) during spreading and subsequent polarization phase.

(d) *SRGAP1* KO podocytes showed extended and widened lamellipodia (arrowheads) and lamella at steady state (full spread) conditions (boxes indicate magnified areas shown in main Figure 5k).

(e) Corresponding to line scan analysis shown in main Figure 5i areas under the curve (AUC) were quantified for the lamellipodia region (10 cells per condition were analyzed; \*\*\*  $p < 0.001$ ).

(f) Quantification of cellular circumference covered by widened ( $>1 \mu\text{m}$ ) lamellipodia (24 WT and 23 KO podocytes at steady state were analyzed; \*\*  $p < 0.01$ ).

(g-h) Podocyte cell size is modulated due to expression levels of *SRGAP1* (161 WT-1&2, 134 *SRGAP1* KO-1&2, 69 control and 66 *SRGAP1* overexpression cells were analyzed; \*\*\*\*  $p < 0.0001$ ).

(i) Corresponding to line scan analysis shown in main Figure 5k immunofluorescence analysis of pMYL9 was correlated to F-Actin (Phalloidin) intensity (line scans were analyzed for 11 cells per genotype; lines show mean and error bars indicate SEM)

(j) Corresponding to line scan analysis shown in main Figure 5k areas under the curve (AUC) were quantified for the lamellipodia region (11 cells per condition were analyzed; \*\*  $p < 0.01$ ).

(k) Western blot analysis of GFP or GFP-SRGAP1 overexpression podocyte.

(l) Overexpression of GFP-SRGAP1 inhibited podocyte spreading (GFP overexpression was used as control; dots indicate independent experiments,  $>85$  cells per experiment and genotype; \*\*\*  $p < 0.001$ ).



## Supplemental Figure 9

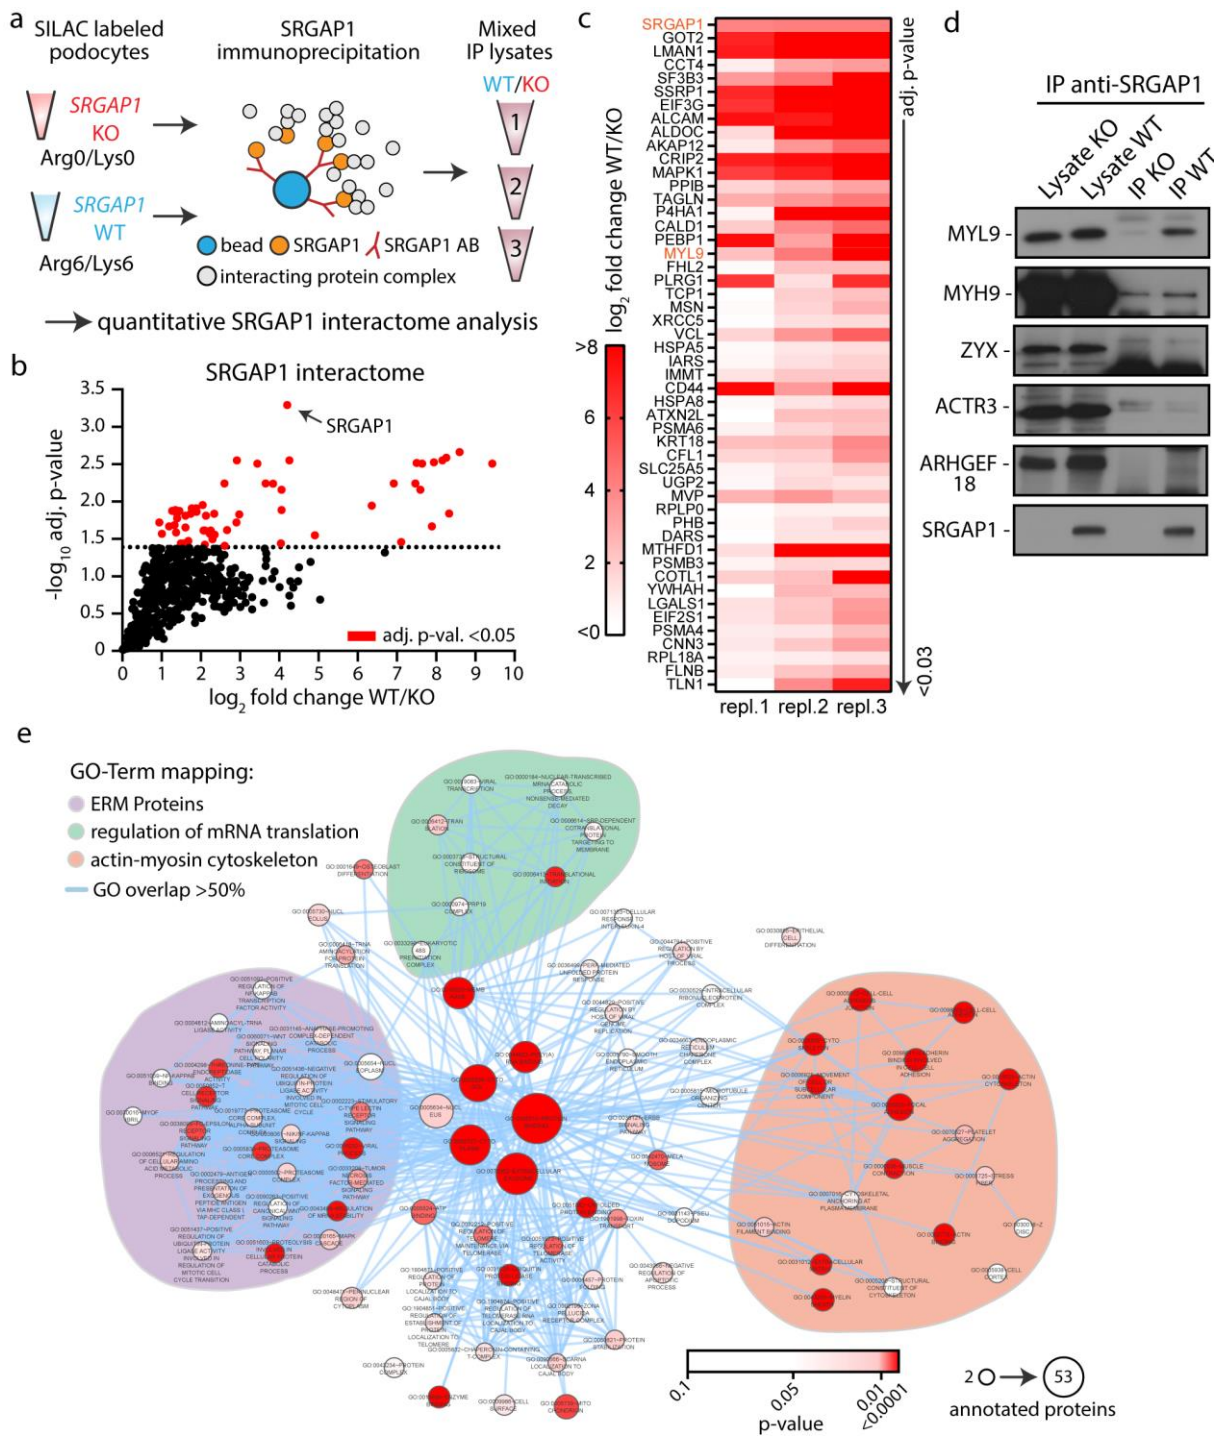

Supplemental Figure 9

(a) Schematic depicting SILAC labeling strategy for interactome analysis of SRGAP1 via endogenous immunoprecipitation (IP).

(b-c) Analysis of SRGAP1 interactome data per volcano plot and heat map identified significant enriched affinity interactors for SRGAP1 (n=3 independent replicates).

(d) Endogenous IP experiments for SRGAP1 confirmed co-precipitation of Myosin Regulatory Light Chain 2 (MYL9).

(e) GO-Term analysis for the podocyte SRGAP1 interactome revealed enrichment of GO-Terms related to ERM protein signaling, regulation of mRNA translation and actin-myosin cytoskeleton regulation.

Supplemental Figure 10

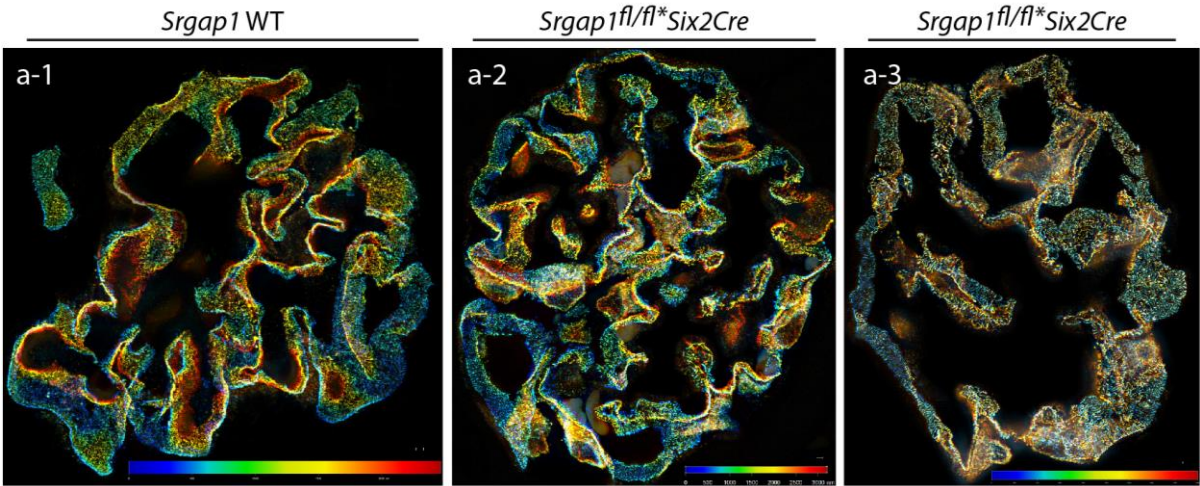

Supplemental Figure 10

(a) Overviews of 3D SIM microscopy in respective WT and KO animals corresponding to Figure 6k.

**Supplementary Table 1**

| <b>Primary Antibodies</b>                                 |              |                |                     |                                                                                                  |
|-----------------------------------------------------------|--------------|----------------|---------------------|--------------------------------------------------------------------------------------------------|
| <b>Target</b>                                             | <b>Clone</b> | <b>Species</b> | <b>Manufacturer</b> | <b>Application</b>                                                                               |
| <b>NPHS1</b>                                              | GP-N2        | guinea pig     | PROGEN              | IF FFPE tissue (1:400, HIAR pH9), cryo tissue (1:300)                                            |
| <b>p-MYL9, Phospho-Myosin Light Chain 2 (Ser19)</b>       | #3671        | rabbit         | Cell Signaling      | IF cells (1:100)                                                                                 |
| <b>p-MYL9, Phospho-Myosin Light Chain 2 (Thr18/Ser19)</b> | #3674        | rabbit         | Cell Signaling      | IF cells (1:100), WB (1:1000)                                                                    |
| <b>PXN</b>                                                | 610051       | mouse IgG1     | BD Biosciences      | IF cells (1:300)                                                                                 |
| <b>TUBA</b>                                               | T9026 (DM1A) | mouse IgG1     | Merck KGaA          | WB (1:10000)                                                                                     |
| <b>CTTN</b>                                               | #3503        | rabbit         | Cell Signaling      | IF (1:50)                                                                                        |
| <b>WT1</b>                                                | 05-753       | mouse          | Millipore           | IF cryo tissue (1:100)                                                                           |
| <b>SRGAP1</b>                                             | 13252-I-AP   | rabbit         | Proteintech         | IF FFPE tissue (1:200, HIAR pH9), WB (1:1000), IP 2µg, human samples (1:200, HIAR pH9 for 15min) |
| <b>SRGAP1</b>                                             | NB100-60650  | rabbit         | Novus Biologicals   | IF FFPE tissue (1:300, HIAR pH9), WB (1:1000)                                                    |
| <b>SRGAP1 (SQ-6)</b>                                      | sc-81939     | mouse          | Santa Cruz          | IF FFPE tissue (1:50, HIAR pH9), WB (1:250)                                                      |
| <b>ILK</b>                                                | #3862        | rabbit         | Cell Signaling      | IF FFPE tissue (1:200, HIAR pH9)                                                                 |
| <b>ITGB1 (CD29)</b>                                       | 610467       | mouse IgG1     | BD Biosciences      | IF FFPE tissue (1:200, HIAR pH9)                                                                 |
| <b>NPHS2</b>                                              | P0372        | rabbit         | Sigma-Aldrich       | IF FFPE tissue (1:600, HIAR pH9)                                                                 |
| <b>TOM20</b>                                              | sc-11415     | rabbit         | Santa Cruz          | IF FFPE tissue (1:400, HIAR pH9)                                                                 |
| <b>MYL9, MLC (Myosin light chain)</b>                     | #8505        | rabbit         | Cell Signaling      | WB (1:1000)                                                                                      |
| <b>MYH9, NMHC-IIA (Myosin II)</b>                         | PRB-440P     | rabbit         | Covance             | WB (1:1000)                                                                                      |
| <b>CFL1 (Cofilin )</b>                                    | #3318        | rabbit         | Cell Signaling      | WB (1:1000)                                                                                      |
| <b>CFL1 Phospho-Cofilin (Ser3)</b>                        | #3311        | rabbit         | Cell Signaling      | WB (1:1000)                                                                                      |
| <b>ZYX</b>                                                | HPA004835    | rabbit         | Atlas Antibodies    | WB (1:1000)                                                                                      |
| <b>ARHGEF18</b>                                           | HPA042689    | rabbit         | Atlas Antibodies    | WB (1:1000)                                                                                      |
| <b>SRGAP2</b>                                             | HPA028191    | rabbit         | Atlas Antibodies    | IF FFPE tissue (1:100, HIAR pH9)                                                                 |
| <b>ACTR3 (ARP3)</b>                                       | ab151729     | rabbit         | Abcam               | WB (1:5000)                                                                                      |
| <b>RAC1</b>                                               | 240106       | mouse          | Cell Biolabs        | WB (1:1000)                                                                                      |
| <b>RHOA</b>                                               | ARH03        | mouse          | Cytoskeleton        | WB (1:500)                                                                                       |
| <b>CDC42</b>                                              | #2462        | rabbit         | Cell Signaling      | WB (1:1000)                                                                                      |

| <b>Secondary Antibodies</b>                      |           |                |                          |                       |
|--------------------------------------------------|-----------|----------------|--------------------------|-----------------------|
| <b>Name</b>                                      | <b>ID</b> | <b>Species</b> | <b>Manufacturer</b>      | <b>Application</b>    |
| <b>Alexa Fluor Phalloidin 488/555</b>            |           |                | Thermo Fisher Scientific | cells (1:200-750)     |
| <b>DAPI</b>                                      |           |                | Thermo Fisher Scientific | cells/tissue (1:1000) |
| <b>Alexa Fluor 555, donkey anti-rabbit IgG</b>   | A-31572   | rabbit         | Thermo Fisher Scientific | cells/tissue (1:500)  |
| <b>Alexa Fluor 488, goat anti-guinea pig IgG</b> | A-11073   | guinea pig     | Thermo Fisher Scientific | cells/tissue (1:500)  |
| <b>Alexa Fluor 555, goat anti-mouse IgG1</b>     | A-21127   | mouse IgG1     | Thermo Fisher Scientific | cells/tissue (1:500)  |
| <b>Alexa Fluor 488, goat anti-mouse IgG1</b>     | A-21121   | mouse IgG1     | Thermo Fisher Scientific | cells/tissue (1:500)  |
| <b>Goat anti-rabbit IgG, HRP-linked Antibody</b> | #7074     | rabbit         | Cell Signaling           | WB (1:5000)           |
| <b>Goat anti-mouse Immunglobulins/HRP</b>        | P0447     | mouse          | Dako                     | WB (1:10000)          |
| <b>Alexa Fluor 647, goat anti-guinea pig IgG</b> | A-21450   | guinea pig     | guinea pig               | tissue (1:400)        |

**Supplementary Table 2**

| ISH                     |                       |
|-------------------------|-----------------------|
| Primer                  | Sequence 5'-3'        |
| <i>Srgap1_Exon 3_fw</i> | AGGTTTCATGGCCAAAACAAG |
| <i>Srgap1_Exon 3_rv</i> | GTGAAGCTGGAACGCAATCT  |
| <i>Srgap1_CDS_fw</i>    | ACAATCTGGCCATTTGCT    |
| <i>Srgap1_CDS_rv</i>    | TCAGTCGGGGAGTTCATG    |
| <i>Srgap1_fw</i>        | AGCCTGCTGTTCTTCCAAAA  |
| <i>Srgap1_rv</i>        | TGCTTGTTGTCGGTTGCT    |
| <i>Srgap2_CDS_fw</i>    | ATGTCCGCATTGAGGAGA    |
| <i>Srgap2_CDS_rv</i>    | GCCTCCATTGTCTTT       |
| <i>Srgap3_CDS_fw</i>    | GAACAAGCTCAAGTGCAC    |
| <i>Srgap3_CDS_rv</i>    | CTTTTGCCGATGTTGATT    |

**Supplementary Table 3**

| Rho GTPases         |            | Podocyte transcriptome |                                           |                 |                    | Podocyte proteome                   |                                   |                                       |                                     |                        |
|---------------------|------------|------------------------|-------------------------------------------|-----------------|--------------------|-------------------------------------|-----------------------------------|---------------------------------------|-------------------------------------|------------------------|
| Ensembl transcript  | Gene names | mean podocyte TPM      | log2 FC (podocyte/non-podocyte TPM based) | log2(FC) DESeq2 | Adj. p-val. DESeq2 | -Log t-test p value (Schell et al.) | t-test Difference (Schell et al.) | -Log t-test p value (Rinschen et al.) | t-test Difference (Rinschen et al.) | mean t-test Difference |
| ENSMUSG00000007815  | Rhoa       | 400.53                 | -0.16                                     | 0.20            | 5.94E-01           | 2.01                                | 0.61                              | 2.72                                  | 1.12                                | 0.87                   |
| ENSMUSG000000054364 | Rhob       | 357.98                 | 1.72                                      | 2.05            | 2.44E-02           | 0.02                                | 0.01                              | 0.63                                  | 0.38                                | 0.19                   |
| ENSMUSG00000006699  | Cdc42      | 318.35                 | -0.27                                     | 0.20            | 5.27E-01           | 0.75                                | -0.18                             | 2.77                                  | 0.67                                | 0.24                   |
| ENSMUSG00000001847  | Rac1       | 317.13                 | -1.34                                     | -0.94           | 4.52E-04           | 0.72                                | -0.20                             | 1.93                                  | 0.34                                | 0.07                   |
| ENSMUSG000000017144 | Rnd3       | 54.73                  | -0.32                                     | 0.12            | 8.22E-01           |                                     |                                   | 1.10                                  | 1.04                                | 1.04                   |
| ENSMUSG000000024143 | Rhoq       | 42.05                  | 0.05                                      | 0.54            | 1.03E-01           |                                     |                                   |                                       |                                     |                        |
| ENSMUSG00000002233  | Rhoc       | 33.40                  | 0.19                                      | 0.58            | 4.90E-01           | 1.01                                | -0.24                             | 0.42                                  | -0.58                               | -0.41                  |
| ENSMUSG000000073982 | Rhog       | 23.89                  | -1.04                                     | -0.68           | 2.09E-01           | 2.08                                | -0.52                             | 0.62                                  | 0.26                                | -0.13                  |
| ENSMUSG000000022075 | Rhobtb2    | 13.59                  | -0.93                                     | -0.44           | 1.39E-01           |                                     |                                   |                                       |                                     |                        |
| ENSMUSG000000054855 | Rnd1       | 7.59                   | 1.03                                      | 2.69            | 2.65E-02           |                                     |                                   |                                       |                                     |                        |
| ENSMUSG000000046768 | Rhoj       | 5.81                   | -2.95                                     | -2.56           | 2.95E-02           |                                     |                                   | 0.57                                  | -1.82                               | -1.82                  |
| ENSMUSG000000029449 | Rhof       | 4.70                   | 1.35                                      | 0.96            | 1.65E-01           |                                     |                                   |                                       |                                     |                        |
| ENSMUSG000000001313 | Rnd2       | 3.52                   | -1.85                                     | -0.27           | 6.84E-01           |                                     |                                   |                                       |                                     |                        |
| ENSMUSG000000041845 | Rhod       | 3.39                   | -1.97                                     | -1.60           | 1.74E-02           |                                     |                                   |                                       |                                     |                        |
| ENSMUSG000000019944 | Rhobtb1    | 2.42                   | -3.80                                     | -2.75           | 1.74E-13           |                                     |                                   |                                       |                                     |                        |
| ENSMUSG000000033220 | Rac2       | 1.68                   | -1.78                                     | -0.70           | 5.59E-01           |                                     |                                   |                                       |                                     |                        |
| ENSMUSG000000018012 | Rac3       | 0.67                   | -1.99                                     | -1.50           | 1.12E-02           |                                     |                                   |                                       |                                     |                        |
| ENSMUSG000000039960 | Rhou       | 0.46                   | -7.11                                     | -7.61           | 3.39E-16           |                                     |                                   |                                       |                                     |                        |
| ENSMUSG000000029204 | Rhoh       | 0.16                   | -2.57                                     | -3.76           | 1.72E-03           |                                     |                                   |                                       |                                     |                        |
| ENSMUSG000000034226 | Rhov       | 0.11                   | -2.02                                     | -2.05           | 1.70E-01           |                                     |                                   |                                       |                                     |                        |

**Supplementary Table 4**

| RhoGAPs & RhoGEFs  |            | Podocyte transcriptome |                                           |                 |                    | Podocyte proteome                   |                                   |                                       |                                     |                        |
|--------------------|------------|------------------------|-------------------------------------------|-----------------|--------------------|-------------------------------------|-----------------------------------|---------------------------------------|-------------------------------------|------------------------|
| Ensembl transcript | Gene names | mean podocyte TPM      | log2 FC (podocyte/non-podocyte TPM based) | log2(FC) DESeq2 | adj- p-val. DESeq2 | -Log t-test p value (Schell et al.) | t-test Difference (Schell et al.) | -Log t-test p value (Rinschen et al.) | t-test Difference (Rinschen et al.) | mean t-test Difference |
| ENSMUSG00000057315 | Arhgap24   | 1520.71                | 4.18                                      | 4.34            | 8.46E-05           | 4.40                                | 1.83                              | 0.88                                  | 1.32                                | 1.57                   |
| ENSMUSG00000059495 | Arhgef12   | 1452.70                | 1.46                                      | 1.74            | 5.58E-04           | 6.35                                | 0.81                              | 0.82                                  | 1.60                                | 1.21                   |
| ENSMUSG00000020121 | Srgap1     | 1348.14                | 3.34                                      | 3.73            | 7.10E-07           | 6.67                                | 1.32                              | 6.22                                  | 4.70                                | 3.01                   |
| ENSMUSG00000004568 | Arhgef18   | 928.74                 | 4.77                                      | 5.27            | 5.91E-86           | 5.90                                | 1.33                              | 4.53                                  | 3.90                                | 2.61                   |
| ENSMUSG00000024043 | Arhgap28   | 675.60                 | 3.65                                      | 4.10            | 3.27E-09           | 4.28                                | 1.67                              | 3.65                                  | 6.09                                | 3.88                   |
| ENSMUSG00000032875 | Arhgef17   | 564.68                 | 1.74                                      | 2.92            | 1.74E-09           | 4.30                                | 0.70                              | 3.20                                  | 2.53                                | 1.62                   |
| ENSMUSG00000031523 | Dlc1       | 491.77                 | 0.50                                      | 0.76            | 5.38E-01           | 2.09                                | -0.24                             | 0.11                                  | 0.27                                | 0.01                   |
| ENSMUSG00000049807 | Arhgap23   | 464.36                 | 1.96                                      | 2.14            | 2.29E-02           | 5.07                                | 0.72                              | 4.47                                  | 3.67                                | 2.19                   |
| ENSMUSG00000017631 | Abr        | 415.66                 | 1.18                                      | 1.56            | 2.26E-04           | 3.37                                | 0.31                              | 0.03                                  | -0.02                               | 0.15                   |
| ENSMUSG00000029032 | Arhgef16   | 345.20                 | 4.10                                      | 4.39            | 9.36E-06           | 5.14                                | 1.67                              | 8.35                                  | 4.65                                | 3.16                   |
| ENSMUSG00000041444 | Arhgap32   | 315.94                 | 1.08                                      | 1.80            | 9.97E-06           | 3.37                                | 0.95                              | 4.65                                  | 5.99                                | 3.47                   |
| ENSMUSG00000026425 | Srgap2     | 249.27                 | 0.79                                      | 1.27            | 8.16E-03           | 6.31                                | 0.81                              | 4.69                                  | 2.08                                | 1.45                   |
| ENSMUSG00000058230 | Arhgap35   | 224.34                 | -0.86                                     | -0.43           | 2.43E-01           | 3.63                                | 0.38                              | 3.72                                  | 1.15                                | 0.76                   |
| ENSMUSG00000027247 | Arhgap1    | 217.99                 | 0.68                                      | 1.03            | 1.04E-02           | 1.12                                | 0.11                              | 2.36                                  | 0.92                                | 0.51                   |
| ENSMUSG00000021990 | Spata13    | 185.11                 | -0.10                                     | 0.44            | 5.56E-01           |                                     |                                   | 3.31                                  | 1.97                                | 1.97                   |
| ENSMUSG00000039031 | Arhgap18   | 178.49                 | 0.97                                      | 1.32            | 9.59E-02           | 6.22                                | 1.01                              | 0.70                                  | -0.52                               | 0.24                   |
| ENSMUSG00000041417 | Pik3r1     | 160.05                 | -0.55                                     | 0.56            | 1.66E-01           | 0.92                                | 0.08                              | 1.88                                  | 1.15                                | 0.62                   |
| ENSMUSG00000034801 | Sos2       | 141.83                 | 0.81                                      | 1.06            | 2.03E-02           | 5.16                                | 0.66                              | 3.21                                  | 2.89                                | 1.77                   |
| ENSMUSG00000035133 | Arhgap5    | 128.05                 | 0.11                                      | 0.51            | 3.57E-01           | 2.82                                | 0.45                              | 2.72                                  | 1.22                                | 0.83                   |
| ENSMUSG00000041225 | Arhgap12   | 125.60                 | 0.86                                      | 1.27            | 4.81E-10           | 4.76                                | 0.82                              | 2.54                                  | 3.60                                | 2.21                   |
| ENSMUSG00000025555 | Farp1      | 118.31                 | -0.33                                     | 0.17            | 6.94E-01           | 6.45                                | 1.03                              | 4.03                                  | 2.35                                | 1.69                   |
| ENSMUSG00000037552 | Plekhg2    | 111.69                 | -0.08                                     | 0.41            | 5.35E-01           |                                     |                                   |                                       |                                     |                        |
| ENSMUSG00000040964 | Arhgef10l  | 104.70                 | 2.19                                      | 2.63            | 7.66E-06           |                                     |                                   | 1.57                                  | 1.48                                | 1.48                   |
| ENSMUSG00000066406 | Akap13     | 104.41                 | -1.55                                     | -0.44           | 3.11E-01           |                                     |                                   | 0.36                                  | -0.31                               | -0.31                  |
| ENSMUSG00000039585 | Myo9a      | 99.24                  | -0.98                                     | -0.60           | 1.66E-01           |                                     |                                   | 3.04                                  | -4.97                               | -4.97                  |
| ENSMUSG00000040940 | Arhgef1    | 95.00                  | 0.08                                      | 0.40            | 4.14E-01           | 1.36                                | -0.09                             | 0.14                                  | 0.07                                | -0.01                  |
| ENSMUSG00000032714 | Syde1      | 91.95                  | 0.38                                      | 1.36            | 1.72E-03           |                                     |                                   | 1.45                                  | 2.81                                | 2.81                   |
| ENSMUSG00000024096 | Ralbp1     | 91.10                  | 0.49                                      | 0.95            | 6.32E-04           | 1.50                                | 0.26                              | 1.03                                  | 0.86                                | 0.56                   |
| ENSMUSG00000022788 | Fgd4       | 86.92                  | -0.76                                     | 0.16            | 7.71E-01           |                                     |                                   | 1.30                                  | 1.73                                | 1.73                   |
| ENSMUSG00000036591 | Arhgap21   | 86.57                  | -0.55                                     | 0.00            | 9.92E-01           | 0.42                                | 0.09                              | 1.13                                  | 0.47                                | 0.28                   |
| ENSMUSG00000020640 | Itsn2      | 86.54                  | -0.19                                     | 0.20            | 7.02E-01           | 0.49                                | 0.03                              | 2.42                                  | 0.76                                | 0.40                   |
| ENSMUSG00000033389 | Arhgap44   | 85.06                  | 1.78                                      | 2.27            | 4.40E-06           |                                     |                                   | 2.59                                  | 4.87                                | 4.87                   |
| ENSMUSG00000022263 | Trio       | 84.53                  | -1.56                                     | -1.09           | 3.27E-06           | 3.86                                | 1.71                              | 1.13                                  | 0.60                                | 1.16                   |
| ENSMUSG00000030766 | Arhgap17   | 78.10                  | 2.01                                      | 1.83            | 5.80E-10           | 2.83                                | 0.49                              | 0.29                                  | 0.67                                | 0.58                   |
| ENSMUSG00000036501 | Fam13b     | 70.52                  | 0.56                                      | 0.96            | 1.29E-03           |                                     |                                   |                                       |                                     |                        |
| ENSMUSG00000001173 | Oclr       | 70.01                  | -0.10                                     | 0.50            | 2.44E-02           | 5.44                                | 0.78                              | 2.66                                  | 2.45                                | 1.61                   |
| ENSMUSG00000033542 | Arhgef5    | 66.03                  | -1.01                                     | -0.66           | 1.89E-01           |                                     |                                   | 0.50                                  | -0.66                               | -0.66                  |

|                    |          |       |       |       |          |      |       |      |       |       |
|--------------------|----------|-------|-------|-------|----------|------|-------|------|-------|-------|
| ENSMUSG00000022957 | Its1     | 65.14 | -0.65 | -0.17 | 7.03E-01 | 3.59 | 0.34  | 2.38 | 1.13  | 0.74  |
| ENSMUSG00000021215 | Net1     | 64.77 | -0.91 | -0.43 | 4.50E-01 |      |       |      |       |       |
| ENSMUSG00000031511 | Arhgef7  | 62.62 | -0.82 | -0.46 | 4.01E-01 | 2.99 | -0.36 | 0.32 | 0.39  | 0.01  |
| ENSMUSG00000071176 | Arhgef10 | 62.05 | 0.06  | 0.57  | 3.24E-01 |      |       | 1.33 | 0.68  | 0.68  |
| ENSMUSG00000039713 | Plekhg5  | 58.17 | 0.93  | 1.29  | 7.81E-03 |      |       |      |       |       |
| ENSMUSG00000028894 | Inpp5b   | 57.66 | -0.33 | 0.30  | 6.66E-01 | 5.19 | -0.89 | 2.93 | -2.13 | -1.51 |
| ENSMUSG00000024241 | Sos1     | 53.40 | -1.11 | -0.62 | 2.71E-02 | 4.51 | 0.37  | 0.60 | 1.49  | 0.93  |
| ENSMUSG00000004677 | Myo9b    | 50.11 | -0.56 | 0.08  | 8.12E-01 |      |       | 0.33 | -1.44 | -1.44 |
| ENSMUSG00000021662 | Arhgef28 | 45.58 | -0.19 | 0.27  | 7.70E-01 |      |       | 0.17 | -0.41 | -0.41 |
| ENSMUSG00000009681 | Bcr      | 44.76 | -0.73 | -0.24 | 5.58E-01 |      |       | 0.21 | -0.58 | -0.58 |
| ENSMUSG00000039831 | Arhgap29 | 39.21 | 0.95  | 0.37  | 6.86E-01 | 0.78 | 0.12  | 0.18 | -0.19 | -0.04 |
| ENSMUSG00000048960 | Prex2    | 38.84 | -2.22 | -1.53 | 1.68E-01 |      |       | 1.59 | -3.60 | -3.60 |
| ENSMUSG00000037999 | Arap2    | 32.55 | -0.93 | 0.85  | 3.55E-01 |      |       | 4.39 | -6.33 | -6.33 |
| ENSMUSG00000052609 | Plekhg3  | 32.50 | -0.48 | -0.05 | 9.44E-01 |      |       | 0.05 | 0.14  | 0.14  |
| ENSMUSG00000026024 | Als2     | 30.47 | -0.45 | 0.09  | 8.28E-01 |      |       | 1.28 | -2.22 | -2.22 |
| ENSMUSG00000034037 | Fgd5     | 30.42 | -2.14 | -1.66 | 2.29E-01 | 4.77 | -1.98 | 3.13 | -6.76 | -4.37 |
| ENSMUSG00000004562 | Arhgef40 | 28.15 | -1.66 | -1.33 | 3.14E-05 | 2.96 | -0.49 | 1.37 | -1.76 | -1.12 |
| ENSMUSG00000032812 | Arap1    | 27.05 | -0.25 | 0.17  | 8.01E-01 | 2.70 | -0.70 | 0.89 | 0.79  | 0.05  |
| ENSMUSG00000052921 | Arhgef15 | 25.02 | -2.79 | -1.71 | 2.37E-01 | 5.79 | -1.13 | 2.05 | -5.49 | -3.31 |
| ENSMUSG00000022799 | Arhgap31 | 24.58 | -2.54 | -2.07 | 1.13E-01 | 6.13 | -1.30 | 1.36 | -0.85 | -1.08 |
| ENSMUSG00000034066 | Farp2    | 22.74 | -0.21 | 0.64  | 1.73E-01 | 4.16 | 0.82  | 2.52 | 3.01  | 1.91  |
| ENSMUSG00000009621 | Vav2     | 20.17 | -0.92 | -0.16 | 8.34E-01 |      |       |      |       |       |
| ENSMUSG00000036246 | Gmip     | 19.81 | 0.15  | 0.70  | 1.64E-01 |      |       | 1.18 | -0.87 | -0.87 |
| ENSMUSG00000036882 | Arhgap33 | 19.67 | -0.82 | 0.01  | 9.87E-01 |      |       |      |       |       |
| ENSMUSG00000031834 | Pik3r2   | 19.44 | 0.96  | 1.54  | 1.52E-03 |      |       | 0.02 | 0.09  | 0.09  |
| ENSMUSG00000033697 | Arhgap39 | 18.90 | -1.43 | -0.92 | 2.88E-02 |      |       |      |       |       |
| ENSMUSG00000031216 | Stard8   | 18.63 | -2.02 | -1.06 | 3.79E-01 |      |       | 1.31 | -2.65 | -2.65 |
| ENSMUSG00000036452 | Arhgap26 | 16.50 | -2.25 | -1.60 | 7.40E-02 | 5.38 | -1.59 | 2.80 | -6.34 | -3.96 |
| ENSMUSG00000020021 | Fgd6     | 15.69 | -2.38 | -1.90 | 1.07E-02 |      |       | 0.13 | -0.09 | -0.09 |
| ENSMUSG00000021895 | Arhgef3  | 15.66 | -1.99 | -1.65 | 1.04E-01 |      |       | 0.59 | -0.52 | -0.52 |
| ENSMUSG00000030257 | Srgap3   | 15.10 | -2.19 | -1.57 | 1.98E-01 |      |       | 0.16 | 0.39  | 0.39  |
| ENSMUSG00000024451 | Arap3    | 13.31 | -3.07 | -2.53 | 4.18E-02 | 2.40 | -0.73 | 3.36 | -6.20 | -3.46 |
| ENSMUSG00000028059 | Arhgef2  | 12.40 | -3.06 | -2.49 | 1.11E-10 | 2.29 | -0.48 | 2.18 | -4.59 | -2.54 |
| ENSMUSG00000025154 | Arhgap19 | 11.41 | -3.05 | -2.51 | 6.16E-04 |      |       |      |       |       |
| ENSMUSG00000061751 | Kalrn    | 11.03 | -2.79 | -2.32 | 7.33E-04 |      |       | 0.47 | 0.53  | 0.53  |
| ENSMUSG00000056486 | Chn1     | 10.70 | -1.51 | -0.91 | 6.53E-02 |      |       |      |       |       |
| ENSMUSG00000053199 | Arhgap20 | 10.10 | -0.28 | 0.39  | 8.01E-01 |      |       |      |       |       |
| ENSMUSG00000037148 | Arhgap10 | 7.34  | -1.74 | -1.60 | 5.75E-04 |      |       |      |       |       |
| ENSMUSG00000031214 | Ophn1    | 7.25  | -1.59 | -1.02 | 1.75E-02 |      |       | 0.07 | 0.11  | 0.11  |
| ENSMUSG00000039621 | Prex1    | 6.52  | -3.08 | -2.59 | 1.20E-02 |      |       | 1.29 | -3.81 | -3.81 |
| ENSMUSG00000025656 | Arhgef9  | 6.09  | -2.13 | -2.69 | 3.95E-05 |      |       |      |       |       |
| ENSMUSG00000023015 | Racgap1  | 6.06  | -3.83 | -4.17 | 4.61E-10 |      |       |      |       |       |
| ENSMUSG00000002489 | Tiam1    | 5.55  | -3.38 | -2.98 | 1.47E-03 |      |       | 0.32 | -0.80 | -0.80 |
| ENSMUSG00000016128 | Stard13  | 5.39  | -2.53 | -1.74 | 2.24E-02 |      |       |      |       |       |

|                     |           |      |       |       |          |      |       |      |       |       |
|---------------------|-----------|------|-------|-------|----------|------|-------|------|-------|-------|
| ENSMUSG00000031133  | Arhgef6   | 5.35 | -1.70 | 0.73  | NA       |      |       | 2.96 | -3.57 | -3.57 |
| ENSMUSG00000025265  | Fgd1      | 5.11 | -3.05 | -2.93 | 4.15E-12 |      |       |      |       |       |
| ENSMUSG00000031442  | Mcf2l     | 4.52 | -2.91 | -3.20 | 7.04E-05 | 3.75 | -1.30 | 2.62 | -3.36 | -2.33 |
| ENSMUSG00000033450  | Tagap     | 4.51 | 1.03  | 0.05  | 8.31E-01 |      |       |      |       |       |
| ENSMUSG00000031355  | Arhgap6   | 4.40 | -1.81 | -1.44 | 1.12E-01 |      |       | 0.79 | -1.63 | -1.63 |
| ENSMUSG00000078954  | Arhgap8   | 3.99 | -2.53 | -1.74 | 1.30E-01 |      |       |      |       |       |
| ENSMUSG00000034255  | Arhgap27  | 3.63 | -3.81 | -3.30 | 1.21E-03 | 5.52 | -1.15 | 3.71 | -4.39 | -2.77 |
| ENSMUSG00000022436  | Sh3bp1    | 3.51 | -3.30 | -1.87 | 4.79E-04 |      |       | 3.15 | -2.97 | -2.97 |
| ENSMUSG00000023800  | Tiam2     | 3.32 | -0.87 | -0.32 | 6.02E-01 |      |       |      |       |       |
| ENSMUSG00000027699  | Ect2      | 3.25 | -4.37 | -3.82 | 5.73E-08 |      |       |      |       |       |
| ENSMUSG00000035697  | Arhgap45  | 3.24 | -1.66 | -0.12 | NA       | 0.15 | 0.02  | 3.96 | -3.58 | -1.78 |
| ENSMUSG00000044037  | Als2cl    | 3.17 | -2.44 | -1.07 | 3.22E-01 |      |       | 0.92 | -0.74 | -0.74 |
| ENSMUSG00000037709  | Fam13a    | 3.00 | -2.64 | -1.18 | 9.85E-02 |      |       |      |       |       |
| ENSMUSG00000037509  | Arhgef4   | 2.95 | -1.76 | -0.92 | 3.11E-01 |      |       |      |       |       |
| ENSMUSG00000019467  | Arhgef25  | 2.67 | -2.90 | -2.34 | 4.61E-02 |      |       |      |       |       |
| ENSMUSG00000050730  | Arhgap42  | 2.28 | -5.03 | -4.65 | 8.54E-12 |      |       |      |       |       |
| ENSMUSG00000004633  | Chn2      | 2.25 | -3.25 | -3.31 | 1.39E-05 |      |       |      |       |       |
| ENSMUSG00000041219  | Arhgap11a | 2.23 | -5.80 | -5.03 | 3.09E-15 |      |       |      |       |       |
| ENSMUSG00000021708  | Rasgrf2   | 1.41 | -3.02 | -2.42 | 1.07E-01 |      |       | 1.95 | -3.48 | -3.48 |
| ENSMUSG00000032356  | Rasgrf1   | 1.33 | -1.69 | -5.51 | 1.62E-03 |      |       | 0.17 | 0.27  | 0.27  |
| ENSMUSG000000061462 | Obscn     | 1.22 | 0.45  | 0.10  | 9.38E-01 |      |       |      |       |       |
| ENSMUSG00000024013  | Fgd2      | 1.01 | -2.31 | -1.51 | 1.05E-01 |      |       |      |       |       |
| ENSMUSG00000033721  | Vav3      | 0.82 | -5.17 | -4.03 | 4.02E-06 |      |       | 0.22 | 0.56  | 0.56  |
| ENSMUSG00000045094  | Arhgef37  | 0.78 | -1.07 | -0.46 | 6.84E-01 |      |       | 2.01 | -1.20 | -1.20 |
| ENSMUSG00000048865  | Arhgap30  | 0.73 | -1.55 | -1.20 | 3.50E-01 |      |       |      |       |       |
| ENSMUSG00000030047  | Arhgap25  | 0.70 | -4.20 | -3.53 | 6.44E-03 |      |       | 1.99 | -3.67 | -3.67 |
| ENSMUSG00000038167  | Plekhg6   | 0.67 | -3.04 | -2.52 | 8.03E-04 |      |       |      |       |       |
| ENSMUSG00000034116  | Vav1      | 0.50 | -0.05 | -0.36 | 7.99E-01 |      |       |      |       |       |
| ENSMUSG00000037946  | Fgd3      | 0.48 | -2.68 | -1.32 | 2.56E-01 |      |       |      |       |       |
| ENSMUSG00000049744  | Arhgap15  | 0.42 | -1.77 | 0.22  | NA       |      |       |      |       |       |
| ENSMUSG00000051517  | Arhgef39  | 0.34 | -4.27 | -3.60 | 1.05E-10 |      |       |      |       |       |
| ENSMUSG00000026259  | Ngef      | 0.24 | -3.30 | -0.07 | 9.65E-01 |      |       |      |       |       |
| ENSMUSG00000040969  | Arhgef38  | 0.24 | -5.93 | -4.84 | 2.33E-03 |      |       |      |       |       |
| ENSMUSG00000054901  | Arhgef33  | 0.16 | -0.94 | -2.36 | 1.42E-01 |      |       |      |       |       |
| ENSMUSG00000028919  | Arhgef19  | 0.14 | -6.37 | -6.04 | 2.16E-07 |      |       |      |       |       |
| ENSMUSG00000063506  | Arhgap22  | 0.10 | -3.29 | -2.57 | 9.23E-02 |      |       |      |       |       |
| ENSMUSG00000021697  | Depdc1b   | 0.07 | -7.35 | -6.89 | 6.13E-18 |      |       |      |       |       |
| ENSMUSG00000074625  | Arhgap40  | 0.06 | -3.98 | -1.55 | 4.56E-01 |      |       |      |       |       |
| ENSMUSG00000036198  | Arhgap36  | 0.05 | -3.58 | -3.13 | 3.54E-02 |      |       |      |       |       |
| ENSMUSG00000025195  | Dnmbp     | 0.00 | -     | -0.65 | 1.40E-01 |      |       | 0.13 | -0.46 | -0.46 |



## References

1. Brunskill, EW, Park, JS, Chung, E, Chen, F, Magella, B, Potter, SS: Single cell dissection of early kidney development: multilineage priming. *Development*, 141: 3093-3101, 2014.
2. Kann, M, Ettou, S, Jung, YL, Lenz, MO, Taglienti, ME, Park, PJ, Schermer, B, Benzing, T, Kreidberg, JA: Genome-Wide Analysis of Wilms' Tumor 1-Controlled Gene Expression in Podocytes Reveals Key Regulatory Mechanisms. *Journal of the American Society of Nephrology : JASN*, 26: 2097-2104, 2015.
3. Schell, C, Rogg, M, Suhm, M, Helmstadter, M, Sellung, D, Yasuda-Yamahara, M, Kretz, O, Kuttner, V, Suleiman, H, Kollipara, L, Zahedi, RP, Sickmann, A, Eimer, S, Shaw, AS, Kramer-Zucker, A, Hirano-Kobayashi, M, Abe, T, Aizawa, S, Grahmmer, F, Hartleben, B, Dengjel, J, Huber, TB: The FERM protein EPB41L5 regulates actomyosin contractility and focal adhesion formation to maintain the kidney filtration barrier. *Proceedings of the National Academy of Sciences of the United States of America*, 114: E4621-E4630, 2017.
4. Rinschen, MM, Godel, M, Grahmmer, F, Zschiedrich, S, Helmstadter, M, Kretz, O, Zarei, M, Braun, DA, Dittrich, S, Pahmeyer, C, Schroder, P, Teetzen, C, Gee, H, Daouk, G, Pohl, M, Kuhn, E, Schermer, B, Kuttner, V, Boerries, M, Busch, H, Schiffer, M, Bergmann, C, Kruger, M, Hildebrandt, F, Dengjel, J, Benzing, T, Huber, TB: A Multi-layered Quantitative In Vivo Expression Atlas of the Podocyte Unravels Kidney Disease Candidate Genes. *Cell reports*, 23: 2495-2508, 2018.
